# Supplementary material
Source: PubMed Central journal article supplement (PMC7704756)
Supplement: mmc1.pdf [file mmc1.pdf]

YMTHE, Volume 28

## **Supplemental Information**

**Combination of *In Situ Lcn2* pRNA-RNAi**

**Nanotherapeutics and iNSC Transplantation**

**Ameliorates Experimental SCI in Mice**

**Alice Braga, Sara Bandiera, Jeroen Verheyen, Regan Hamel, Carola Rutigliani, Frank Edenhofer, Jayden Aaron Smith, and Stefano Pluchino**

## Supplemental Information

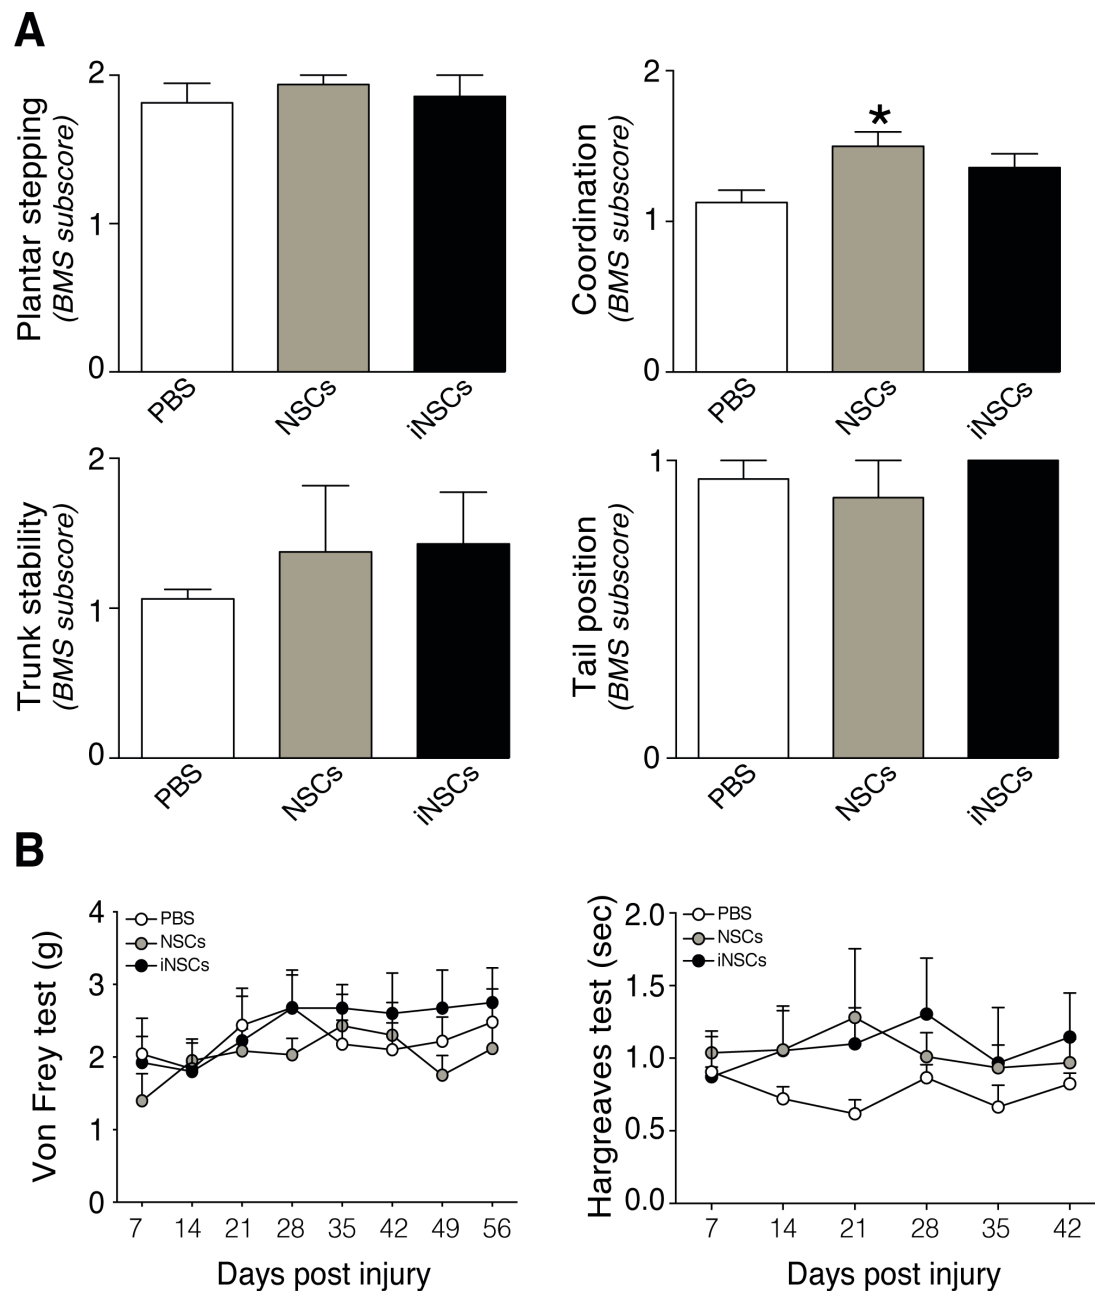

**Figure S1. Evaluation of fine locomotion after NSC transplantation and assessment of allodynia.**

(A) BMS sub-score parameters (plantar stepping, coordination, trunk stability, tail position) at 56 dpi. Data are mean values ( $\pm$  SEM) from  $n \geq 4$  mice per group. \* $p < 0.05$ , vs. PBS group. (B) Mechanical allodynia (left) and thermal allodynia (right) by Von Frey test and Hargreaves test, respectively. Data are mean values ( $\pm$  SEM) from  $n \geq 4$  mice per group. BMS = Basso Mouse Scale; dpi = days post injury.

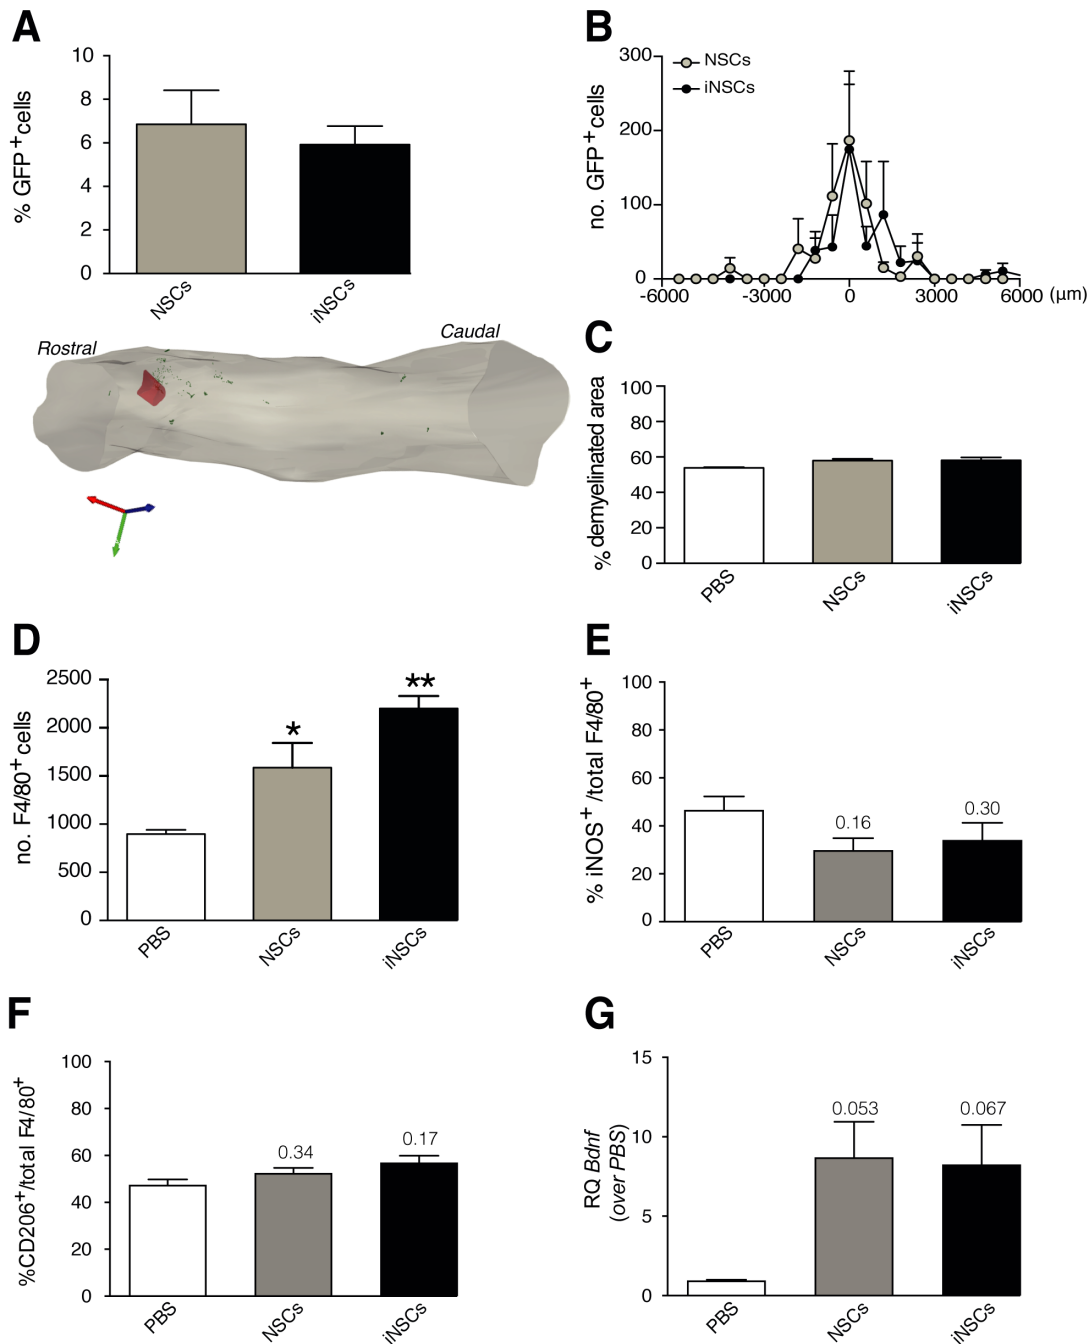

**Figure S2. Ex vivo pathological analysis of spinal tissue.**

(A) Proportion of surviving fGFP-NSCs or fGFP-iNSCs at 56 dpi over total transplanted cells. Data are mean values ( $\pm$  SEM) from  $n=3$  mice per group. Representative 3D reconstruction depicting the lesion volume in red and fGFP-iNSCs as green dots. (B) Evaluation of migratory capabilities of transplanted cells. Distance from the lesion epicentre (0) is represented in  $\mu\text{m}$ . Data are mean values ( $\pm$  SEM) from  $n=3$  mice per group. (C) Quantification of Luxol Fast Blue demyelinated area. Data are mean % percentage of demyelinated area over the total spinal cord section area ( $\pm$  SEM) from  $n=3$  mice per group. (D) Quantification of F4/80-positive cells at 56 dpi. Data are mean numbers ( $\pm$  SEM) from  $n=3$  mice per group. \* $p < 0.05$  and \*\* $p < 0.01$ , vs. PBS. (E) iNOS-positive cells over the total number of F4/80-positive cells at 56 dpi. (F) CD206-positive cells over the total number of F4/80-positive cells at 56 dpi. Data in E and F are mean % of double positive cells over the total number of F4/80-positive cells ( $\pm$  SEM) from  $n \geq 5$  mice per group. (G) qRT-PCR of *Bdnf* mRNA expression levels, expressed as a Relative Quantification (RQ) versus the *Gapdh* reference gene. Data are mean mRNA expression (vs. PBS) ( $\pm$  SEM) from  $n=3$  mice per group. dpi = days post injury.

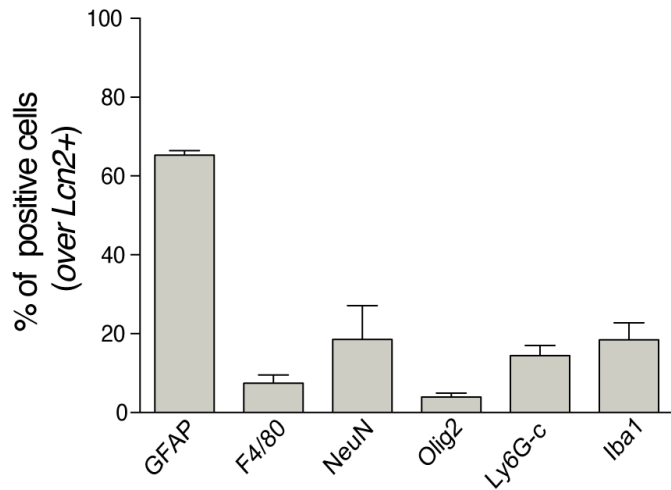

**Figure S3. Lcn2 expression in spinal tissue.**

Relative percentages of cell types expressing Lcn2 in the spinal cord at 21 dpi. Data are expressed as mean % of double positive cells over the total number of Lcn2-positive cells ( $\pm$  SEM) from  $n=3$  mice. dpi = days post injury.

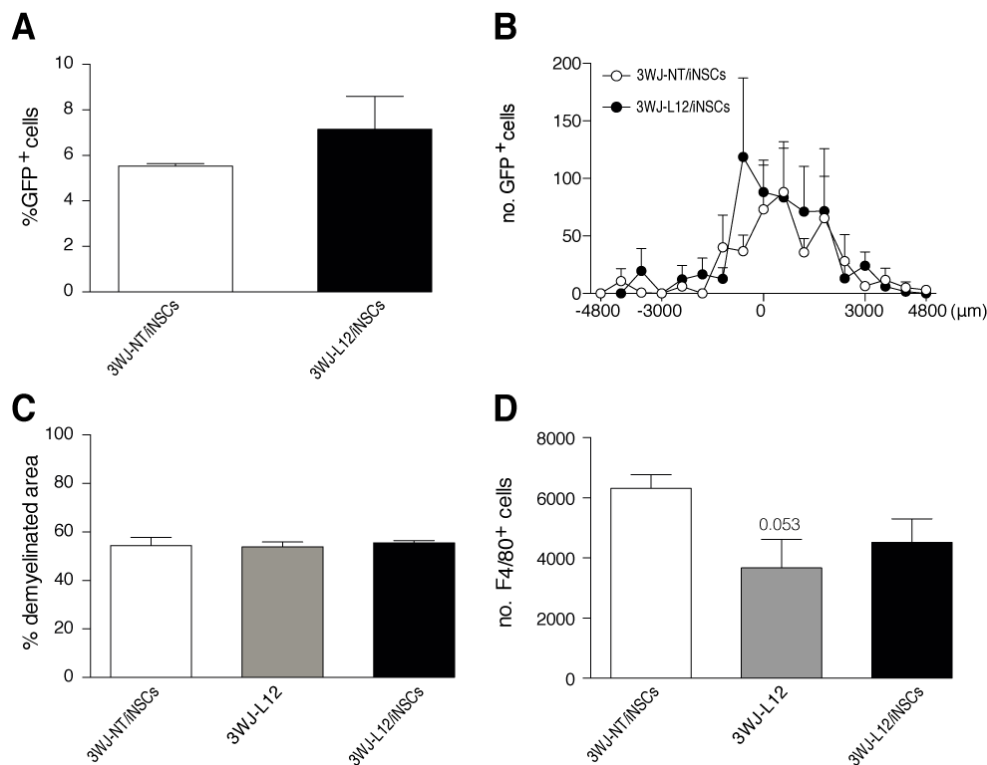

**Figure S4. Ex vivo pathological analysis of spinal tissue from combinatorial treatment groups.**

(A) Surviving fGFP-iNSCs in the spinal cord at 56 dpi over total transplanted cells. Data are mean % ( $\pm$  SEM) from  $n=3$  mice per group. (B) Evaluation of migratory capabilities of transplanted cells. Distance from the lesion epicentre (0) is represented in  $\mu\text{m}$ . Data are mean values ( $\pm$  SEM) from  $n=3$  mice per group. (C) Quantification of Luxol Fast Blue demyelinated area. Data mean % of demyelinated area over the total area of the spinal cord section ( $\pm$  SEM) from  $n=3$  mice per group. (D) Quantification of F4/80-positive cells at 56 dpi. Data are as mean values ( $\pm$  SEM) from  $n \geq 4$  mice per group. Dpi = days post injury.
